# Supplementary material
Source: PubMed Central journal article supplement (PMC2718728)

Supplemental Figure 1

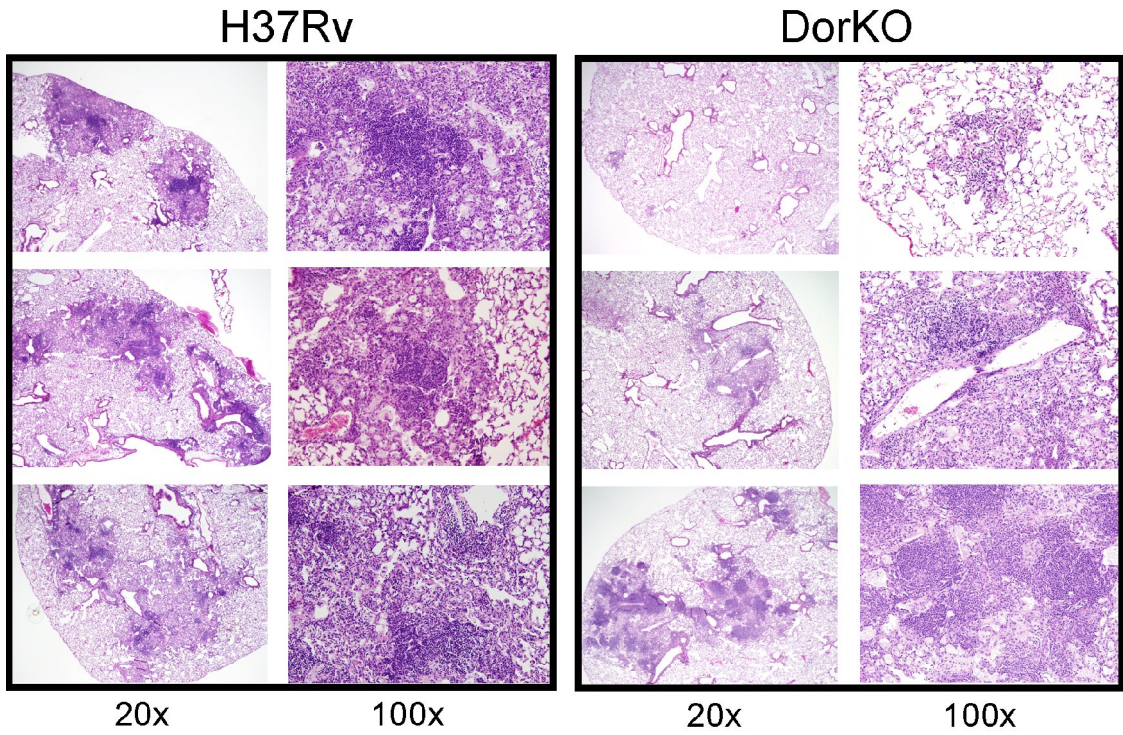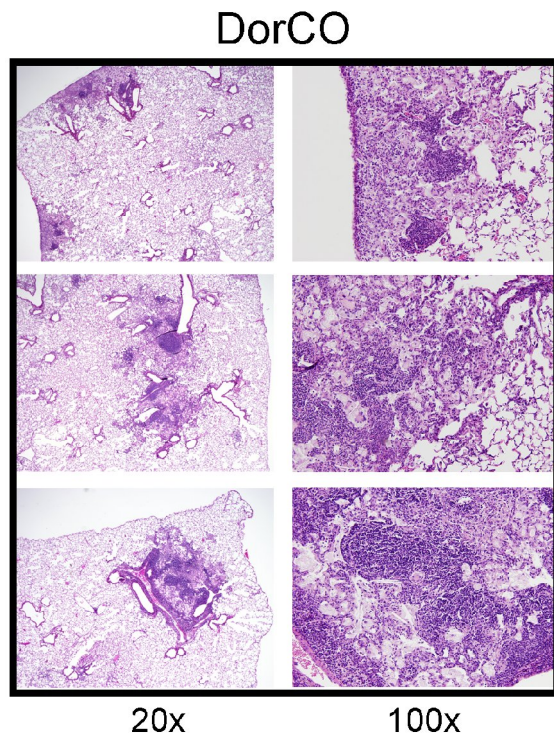

Supplement: NIHMS130300-supplement-01.pdf [file NIHMS130300-supplement-01.pdf]
